# Supplementary material for: A study on the efficient separation of oily water using mullite whiskers membrane through combined filtration and electrofiltration
Source: Royal Society of Chemistry journal article supplement (doi:10.1039/d4ra05193a), 2024-01-01
Supplement: d4ra05193a1.pdf [file d4ra05193a1.pdf]

## Supporting Information

### A Study on the Efficient Separation of Oily Water Using Mullite Whiskers Membrane through Combined Filtration and Electrofiltration

M. Naseri <sup>a</sup>, M. R. Omidkhah <sup>a,\*1</sup>, S. F. Mousavi <sup>b</sup>

<sup>a</sup> Process Engineering Department, Faculty of Chemical Engineering, Tarbiat Modares University, Tehran, Iran.

<sup>b</sup> School of Chemical, Petroleum and Gas Engineering, Iran University of Science and Technology, Tehran, Iran.

---

\* Corresponding author. Tel: +98-21-82-88-3334, E-mail: [omidkhah@modares.ac.ir](mailto:omidkhah@modares.ac.ir)

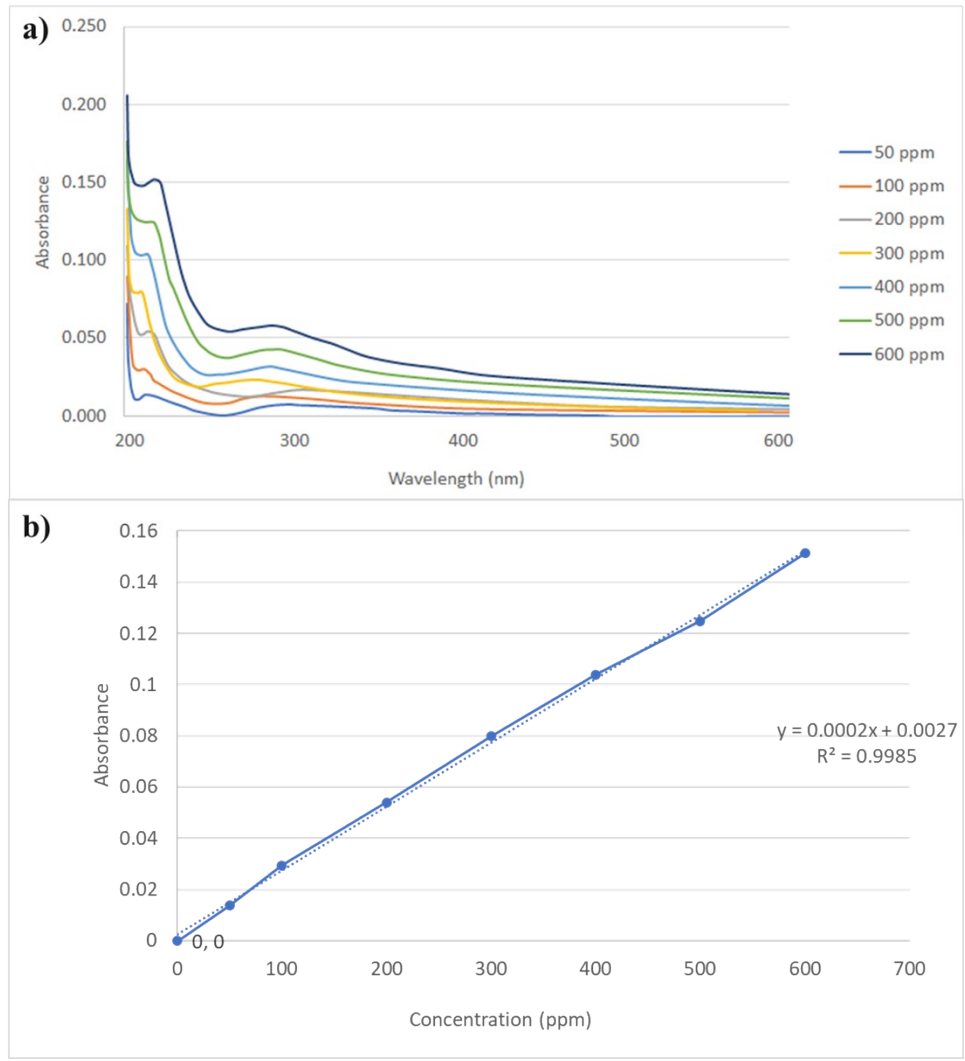

Fig. S1. a) Absorbance vs. wavelength (nm) for different oily water concentrations. b) Standard curve showing absorbance vs. concentration at 220 nm.
